# Supplementary material for: General calculation method of power boundary of multiport power electronic transformer
Source: Frontiers journal article supplement (doi:10.3389/fenrg.2024.1422906), 2024-06-27
Supplement: Image_1.pdf [file Image_1.pdf]

## Supplementary Material

Limited by the length of this paper, the IDBS-MPET containing S-Port in phase b, the IDBS-MPET containing S-Port in phase c, the IDBS-MPET containing D-Port in phase b and phase c, the IDBS-MPET containing D-Port in phase a and phase c are listed in this supplementary material.

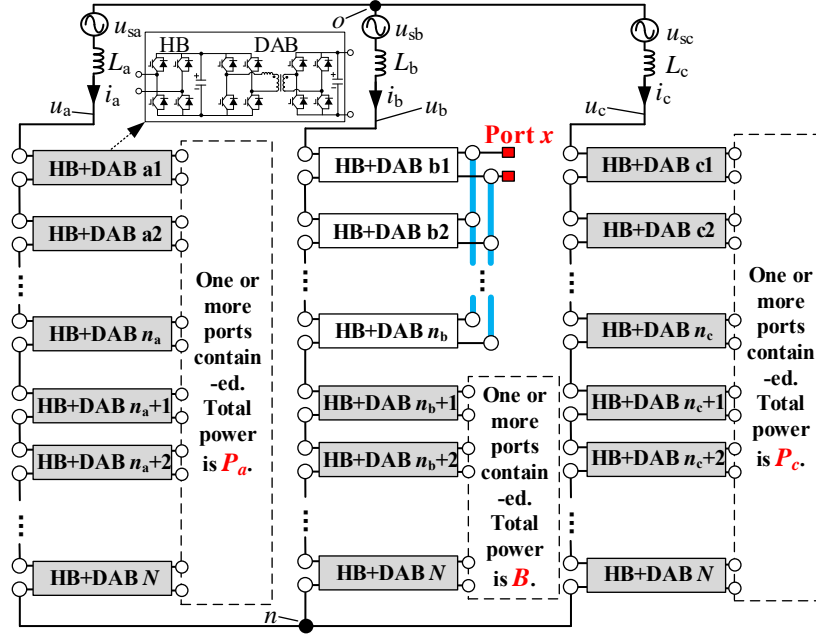

Figure A1. The IDBS-MPET containing S-Port in phase b.

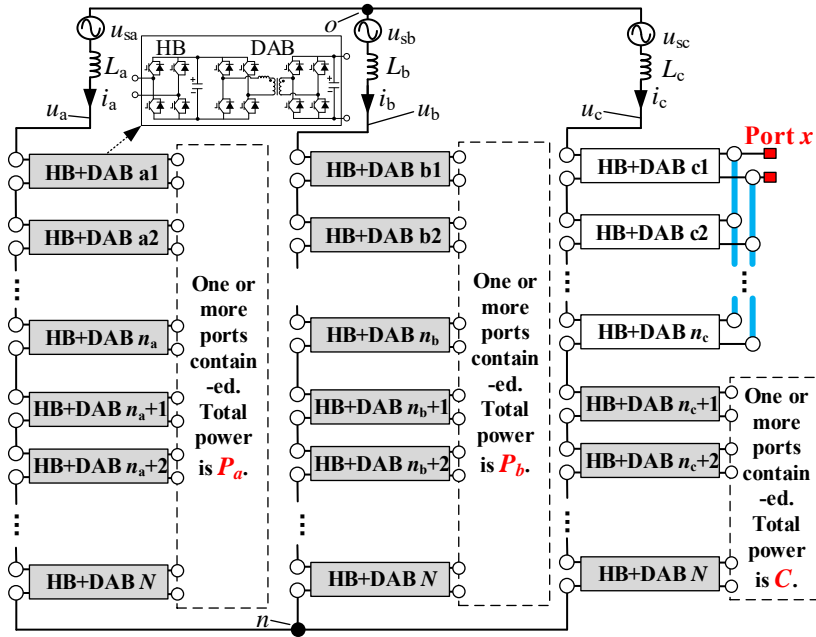

Figure A2. The IDBS-MPET containing S-Port in phase c.

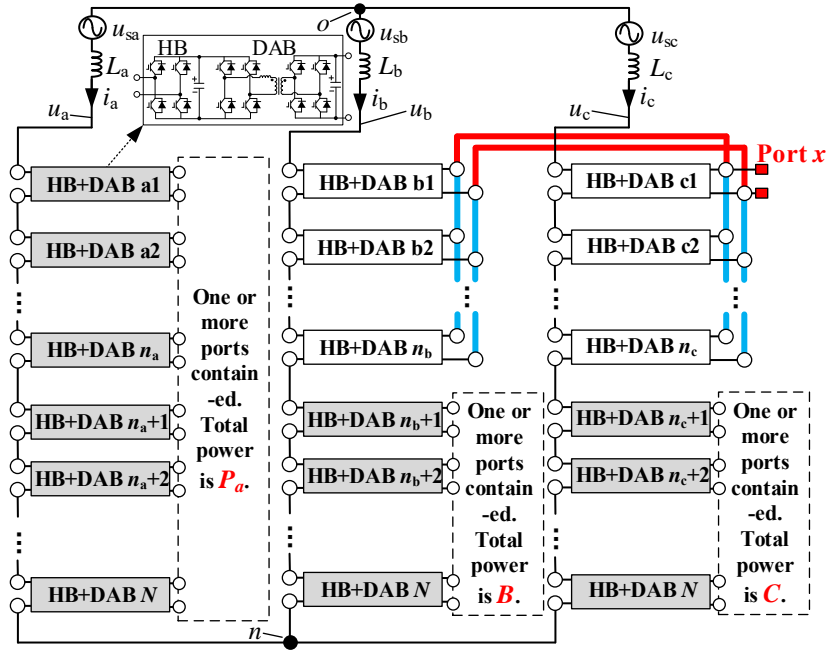

Figure A3. The IDBS-MPET containing D-Port in phase b and phase c.

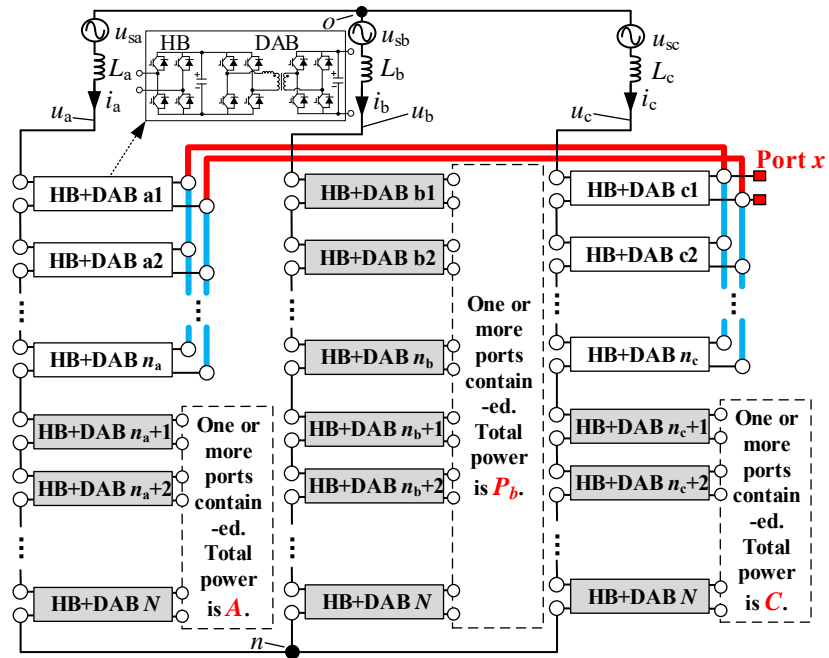

Figure A4. The IDBS-MPET containing D-Port in phase a and phase c.
